# Supplementary material for: The moderating effect of cognitive reserve on cognitive function in patients with Acute Ischemic Stroke
Source: PubMed Central journal article supplement (PMC9710856; doi:10.3389/fnagi.2022.1011510), 2022-11-16
Supplement: Data_Sheet_1.pdf [file Data_Sheet_1.pdf]

## Appendix

### Supplementary Materials:

Table 1 The list of covariates coding

| Covariates                       | Categorical variables                                               | Coding                          |
|----------------------------------|---------------------------------------------------------------------|---------------------------------|
| Sociodemographic characteristics | Gender                                                              | Male = 1, female = 0            |
|                                  | Rural/Urban Residency                                               | Urban = 1, Rural = 0            |
|                                  | Marital status                                                      | Married=1, others=0             |
| Classification of stroke         | Oxfordshire Community Stroke Project (OCSP) Classification          |                                 |
|                                  | Lacunar circulation infarcts (LACI)                                 | LACI=Reference                  |
|                                  | Total anterior circulation infarct (TACI)                           |                                 |
|                                  | Partial anterior circulation infarct (PACI)                         |                                 |
|                                  | Posterior circulation infarct (POCI)                                |                                 |
|                                  | Trial of ORG 10172 in Acute Stroke Treatment (TOAST) Classification |                                 |
|                                  | Large-artery atherothrombotic (LAA)                                 | LAA=Reference                   |
|                                  | Cardioembolic (CE)                                                  |                                 |
| Comorbidities                    | Hypertension                                                        | Hypertension=1, no=0            |
|                                  | Diabetes                                                            | Diabetes=1, no=0                |
|                                  | Dyslipidemia                                                        | Dyslipidemia=1, no=0            |
|                                  | Atrial fibrillation                                                 | Atrial fibrillation=1, no=0     |
| Stroke risk factors              | Cerebral vascular stenosis                                          |                                 |
|                                  | Mild                                                                | Mild=Reference                  |
|                                  | Moderate                                                            |                                 |
|                                  | Severe                                                              |                                 |
|                                  | Smoking                                                             | Smoking=1, no=0                 |
|                                  | Drinking                                                            | Drinking=1, no=0                |
|                                  | Prior history of stroke                                             | Prior history of stroke=1, no=0 |

Table 2 Univariate linear regression for cognitive function of AIS patients

| Variables                  | B      | 95% CI  |        | <i>p</i> |
|----------------------------|--------|---------|--------|----------|
|                            |        | Lower   | Upper  |          |
| Gender(Male)               | 0.674  | -1.454  | 2.803  | 0.533    |
| Age                        | -0.141 | -0.242  | -0.040 | 0.006    |
| Residency (Urban)          | 2.281  | -0.753  | 5.314  | 0.140    |
| Marital status (Married)   | 4.020  | 1.414   | 6.626  | 0.003    |
| OCSP classification        |        |         |        |          |
| LACI (Reference)           |        |         |        |          |
| TACI                       | -3.690 | -7.265  | -0.115 | 0.043    |
| PACI                       | -3.476 | -6.066  | -0.885 | 0.009    |
| POCI                       | -2.555 | -5.06   | -0.050 | 0.046    |
| TOAST classification       |        |         |        |          |
| LAA (Reference)            |        |         |        |          |
| CE                         | 0.339  | -2.770  | 3.447  | 0.830    |
| SAO                        | 3.366  | 0.903   | 5.829  | 0.008    |
| ODE                        | 0.504  | -2.438  | 3.446  | 0.736    |
| UDE                        | -6.086 | -12.901 | 0.729  | 0.080    |
| Cerebral vascular stenosis |        |         |        |          |
| Mild (Reference)           |        |         |        |          |
| Moderate                   | -3.812 | -5.847  | -1.776 | <0.001   |
| Severe                     | -7.673 | -11.489 | -3.856 | <0.001   |
| Hypertension               | -1.595 | -3.961  | 0.772  | 0.185    |
| Diabetes                   | -3.621 | -5.614  | -1.627 | <0.001   |
| Dyslipidemia               | -1.458 | -3.970  | 1.053  | 0.254    |
| Atrial fibrillation        | -4.189 | -7.016  | -1.362 | 0.004    |
| Smoking                    | -0.079 | -2.132  | 1.975  | 0.940    |
| Drinking                   | 0.094  | -2.082  | 2.007  | 0.928    |
| Previous history of stroke | -1.141 | -3.596  | 1.314  | 0.361    |
| NIHSS                      | -0.893 | -1.053  | -0.734 | <0.001   |
| CRIq                       | 0.067  | 0.006   | 0.128  | 0.031    |

Note:NIHSS=National Institutes of Health Stroke Scale; OCSP=Oxfordshire Community Stroke Project; TACI=Total anterior circulation infarct; PACI=Partial anterior circulation infarct; POCI=Posterior circulation infarct; LACI=Lacunar circulation infarcts; TOAST=Trial of ORG 10172 in Acute Stroke Treatment; LAA=Large-artery atherothrombotic; CE=Cardioembolic; SAO=Small-artery occlusion; ODE= Other determined etiology; UDE=Undetermined etiology; CRIq=Cognitive Reserve Index questionnaire; CI=Confidence Interval; B=Unstandardized Coefficient.

Table 3 Pearson correlation between Cognitive Reserve, NIHSS, and Age

| Variables | NIHSS | Age    |
|-----------|-------|--------|
| CRIq      | 0.001 | -0.007 |
| NIHSS     | —     | 0.059  |
| Age       |       | —      |

Note: CRIq=Cognitive Reserve Index questionnaire; NIHSS=National Institutes of Health Stroke Scale;  
 \*Correlation is significant at  $p < 0.05$  level. \*\* Correlation is significant at  $p < 0.01$  level.

Table 4 Spearman correlation between Marital status, OCSF classification, TOAST classification, Cerebral vascular stenosis, Diabetes, and Atrial fibrillation

| Variables                  | OCSF classification | TOAST classification | Cerebral vascular stenosis | Diabetes | Atrial fibrillation |
|----------------------------|---------------------|----------------------|----------------------------|----------|---------------------|
| Marital status             | 0.047               | 0.129                | -0.008                     | -0.076   | -0.045              |
| OCSF classification        | -                   | 0.212**              | -0.209**                   | -0.107   | -0.038              |
| TOAST classification       |                     | -                    | -0.180*                    | 0.045    | -0.182**            |
| Cerebral vascular stenosis |                     |                      | -                          | 0.078    | 0.162*              |
| Diabetes                   |                     |                      |                            | -        | 0.161*              |
| Atrial fibrillation        |                     |                      |                            |          | -                   |

Note: OCSF=Oxfordshire Community Stroke Project; TOAST=Trial of ORG 10172 in Acute Stroke Treatment; \*Correlation is significant at  $p < 0.05$  level. \*\* Correlation is significant at  $p < 0.01$  level.

Table 5 Multivariate regression with all variables included

| Variables                  | B      | P      | 95% CI |        | VIF   |
|----------------------------|--------|--------|--------|--------|-------|
|                            |        |        | lower  | upper  |       |
| NIHSS                      | -0.803 | <0.001 | -0.993 | -0.613 | 1.583 |
| CRIq                       | 0.057  | 0.037  | 0.003  | 0.110  | 1.300 |
| NIHSS * CRIq               | -0.011 | 0.032  | -0.021 | -0.001 | 1.149 |
| Gender(Male)               | 1.847  | 0.111  | -0.425 | 4.119  | 1.972 |
| Age                        | -0.135 | 0.003  | -0.223 | -0.046 | 1.291 |
| Residency (Urban)          | 1.343  | 0.314  | -1.284 | 3.971  | 1.288 |
| Married                    | 1.682  | 0.132  | -0.512 | 3.876  | 1.179 |
| OCSP classification        |        |        |        |        |       |
| LACI (Reference)           |        |        |        |        |       |
| TACI                       | -0.951 | 0.569  | -4.242 | 2.340  | 1.637 |
| PACI                       | -1.348 | 0.305  | -3.931 | 1.235  | 2.127 |
| POCI                       | -0.247 | 0.856  | -2.933 | 2.438  | 2.475 |
| TOAST classification       |        |        |        |        |       |
| LAA (Reference)            |        |        |        |        |       |
| CE                         | -1.362 | 0.332  | -4.126 | 1.402  | 1.636 |
| SAO                        | -1.029 | 0.470  | -3.833 | 1.775  | 2.927 |
| ODE                        | 0.226  | 0.855  | -2.200 | 2.652  | 1.442 |
| UDE                        | -6.169 | 0.033  | -11.82 | -0.518 | 1.191 |
| Cerebral vascular stenosis |        |        |        |        |       |
| Mild (Reference)           |        |        |        |        |       |
| Moderate                   | -0.557 | 0.570  | -2.486 | 1.372  | 1.482 |
| Severe                     | -2.302 | 0.202  | -5.851 | 1.247  | 1.427 |
| Hypertension               | 0.138  | 0.889  | -1.822 | 2.099  | 1.181 |
| Diabetes                   | -1.845 | 0.038  | -3.588 | -0.102 | 1.252 |
| Dyslipidemia               | 1.048  | 0.341  | -1.117 | 3.213  | 1.281 |
| Atrial fibrillation        | -0.864 | 0.517  | -3.489 | 1.761  | 1.438 |
| Smoking                    | -1.567 | 0.162  | -3.768 | 0.634  | 1.991 |
| Drinking                   | 0.203  | 0.840  | -1.774 | 2.180  | 1.622 |
| Previous history of stroke | 0.292  | 0.784  | -1.812 | 2.397  | 1.269 |

Note: NIHSS=National Institutes of Health Stroke Scale; CRIq=Cognitive Reserve Index questionnaire; OCSP=Oxfordshire Community Stroke Project; TACI=Total anterior circulation infarct; PACI=Partial anterior circulation infarct; POCI=Posterior circulation infarct; LACI=Lacunar circulation infarcts; TOAST=Trials of ORG 10172 in Acute Stroke Treatment; LAA=Large-artery atherothrombotic; CE=Cardioembolic; SAO=Small-artery occlusion; ODE= Other determined etiology; UDE=Undetermined etiology; CI=Confidence Interval; B=Unstandardized Coefficient; VIF=Variance Inflation Factor.

Table 6 Sensitivity analysis of cognitive function (MoCA) by NIHSS and Cognitive Reserve (CRIq)

| Variables           | B       | 95%CI   |         | <i>p</i> |
|---------------------|---------|---------|---------|----------|
|                     |         | Lower   | upper   |          |
| NIHSS<5 (Reference) |         |         |         |          |
| NIHSS 5-15          | -3.938  | -5.683  | -2.192  | <0.001   |
| NIHSS>15            | -15.560 | -18.536 | -12.584 | <0.001   |
| CRIq≤84 (Reference) |         |         |         |          |
| CRIq 85-114         | 2.001   | 0.019   | 3.983   | 0.048    |
| CRIq ≥115           | 3.957   | 1.396   | 6.517   | 0.003    |
| Age                 | -0.141  | -0.223  | -0.060  | 0.001    |
| Married             | 1.845   | -0.244  | 3.933   | 0.083    |
| Diabetes            | -2.401  | -4.069  | -0.734  | 0.005    |

Note: NIHSS=National Institutes of Health Stroke Scale; CRIq=Cognitive Reserve Index questionnaire; CI=Confidence Interval; B=Unstandardized Coefficient.

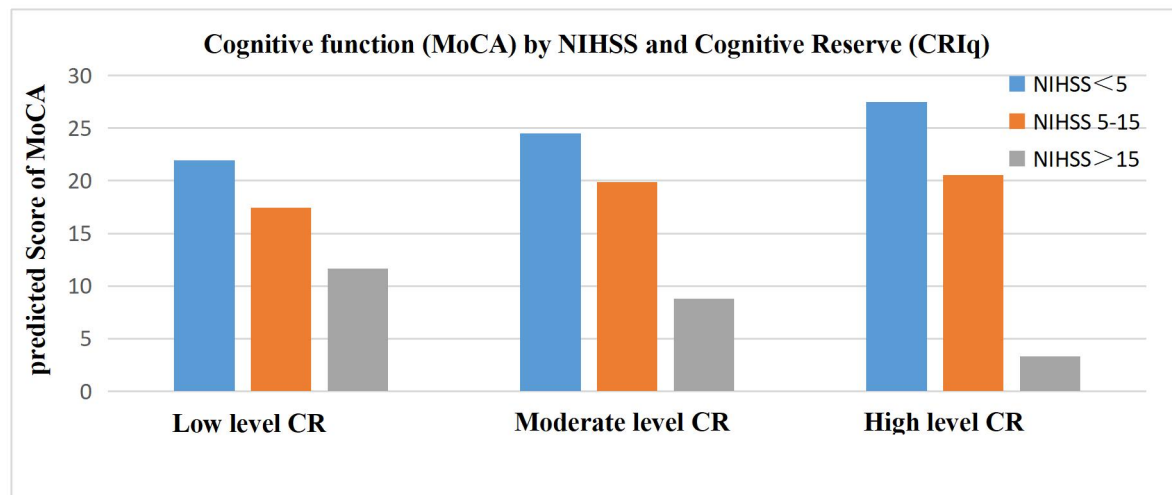

Figure 1. Visual representations showing the moderating effect of cognitive reserve (CRIq) on the relationship between stroke severity (NIHSS) and cognitive function (MoCA). Stroke severity was stratified into low (NIHSS<5), moderate (5≤NIHSS≤15) and high (NIHSS>15). Cognitive reserve was stratified into low (CRIq≤84), moderate (85≤CRIq≤114) and high (CRIq≥115).
